# Supplementary material for: Formaldehyde gas sensor with extremely high response employing cobalt-doped SnO2 ultrafine nanoparticles
Source: Royal Society of Chemistry journal article supplement (doi:10.1039/d1na00625h), 2022-01-01
Supplement: d1na00625h1.pdf [file d1na00625h1.pdf]

## Supporting Information

### Formaldehyde Gas Sensor with Extremely High Response Employing Cobalt-Doped SnO<sub>2</sub> Ultrafine Nanoparticles

Shiqiang Zhou<sup>§,a,b</sup>, Huapeng Wang<sup>§,a</sup>, Jicu Hu<sup>§,a</sup>, Tianping Lv<sup>a</sup>, Qian Rong<sup>a</sup>, Yumin Zhang<sup>a</sup>, Baoye Zi<sup>a</sup>, Mingpeng Chen<sup>c</sup>, Dongming Zhang<sup>a</sup>, Jun Wei<sup>b</sup>, Jin Zhang<sup>\*,a</sup> and Qingju Liu<sup>\*,a</sup>

<sup>a</sup> *Yunnan Key Laboratory for Micro/Nano Materials & Technology, National Center for International Research on Photoelectric and Energy Materials, School of Materials and Energy, Yunnan University, Kunming 650091, P. R. China.*

<sup>b</sup> *Shenzhen Key Laboratory of Flexible Printed Electronics Technology Center, Harbin Institute of Technology, Shenzhen, University Town, Shenzhen, 518055, China*  
*China.*

<sup>c</sup> *Institute of Applied Physics and Materials Engineering, University of Macau, Macau SAR, China*

\* Corresponding E-mail: [qjliu@ynu.edu.cn](mailto:qjliu@ynu.edu.cn)

---

\* Corresponding author. E-mail address: [qjliu@ynu.edu.cn](mailto:qjliu@ynu.edu.cn) (Q. Liu), [zhj@ynu.edu.cn](mailto:zhj@ynu.edu.cn).

§ These authors contributed equally to this work.

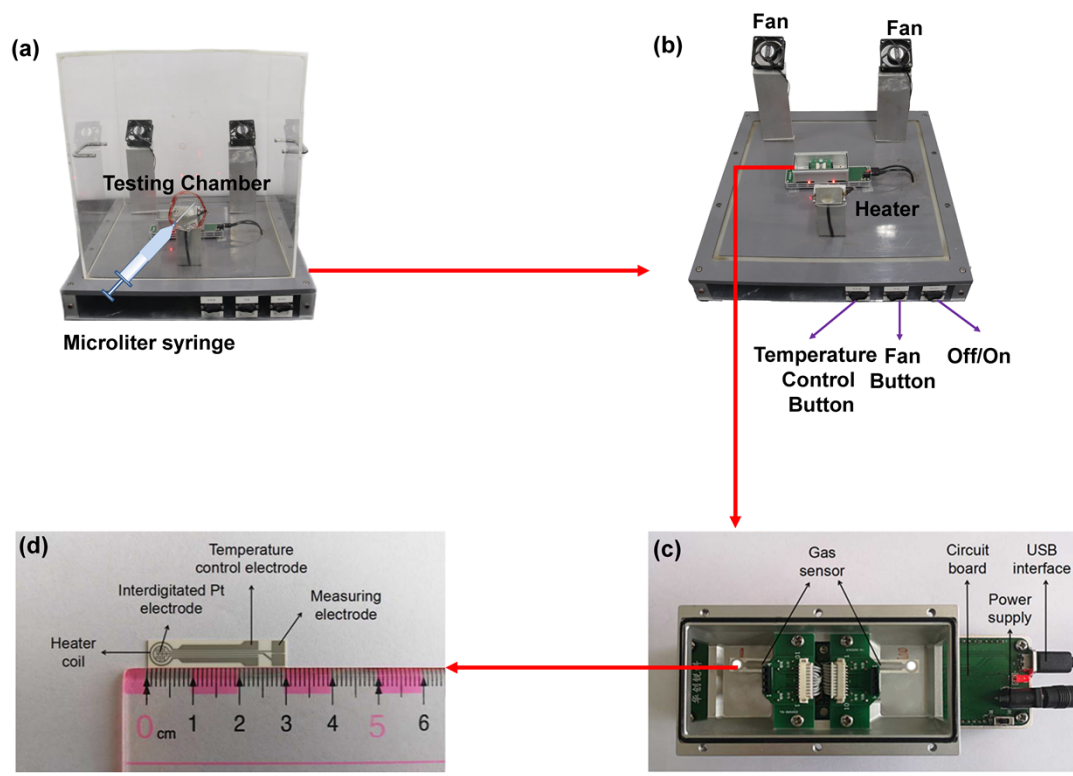

**Figure S1** The actual picture of the test device and gas sensor.

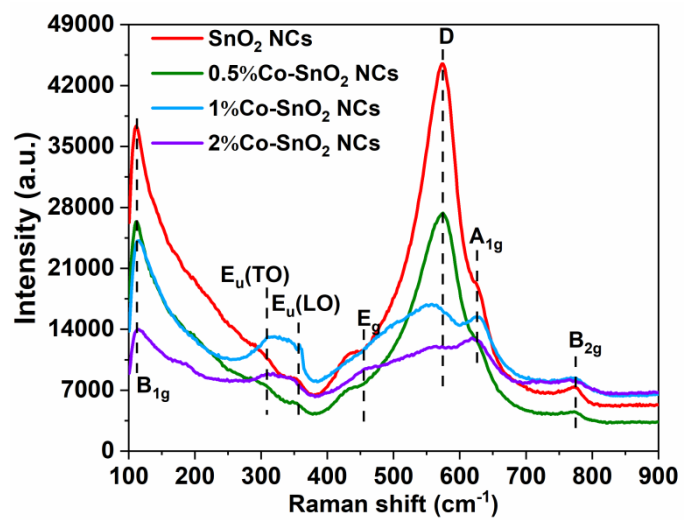

**Figure S2** The Raman spectra of SnO<sub>2</sub> NPs, 0.5%Co-SnO<sub>2</sub> NPs, 1%Co-SnO<sub>2</sub> NPs, 2%Co-SnO<sub>2</sub> NPs.

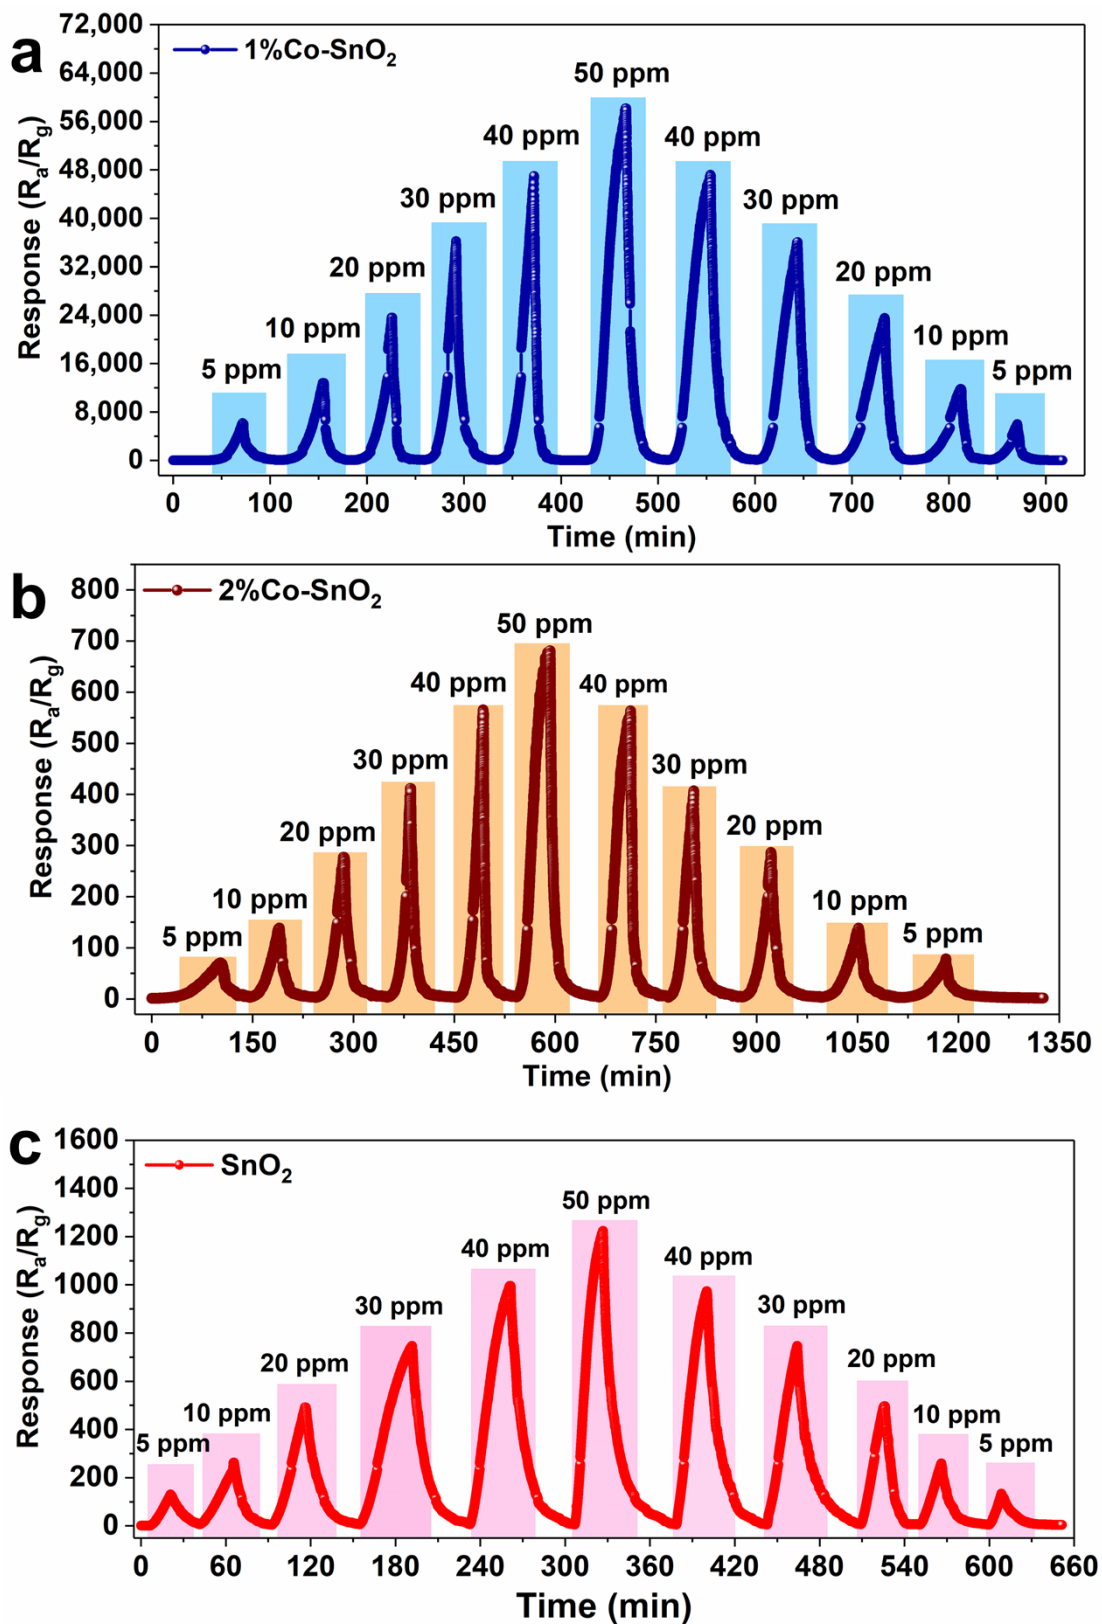

**Figure S3** The response transient curves of the (a) 1%Co-SnO<sub>2</sub> NPs, (b) 2%Co-SnO<sub>2</sub> NPs, (c) SnO<sub>2</sub> NPs at 90°C and different formaldehyde concentration.

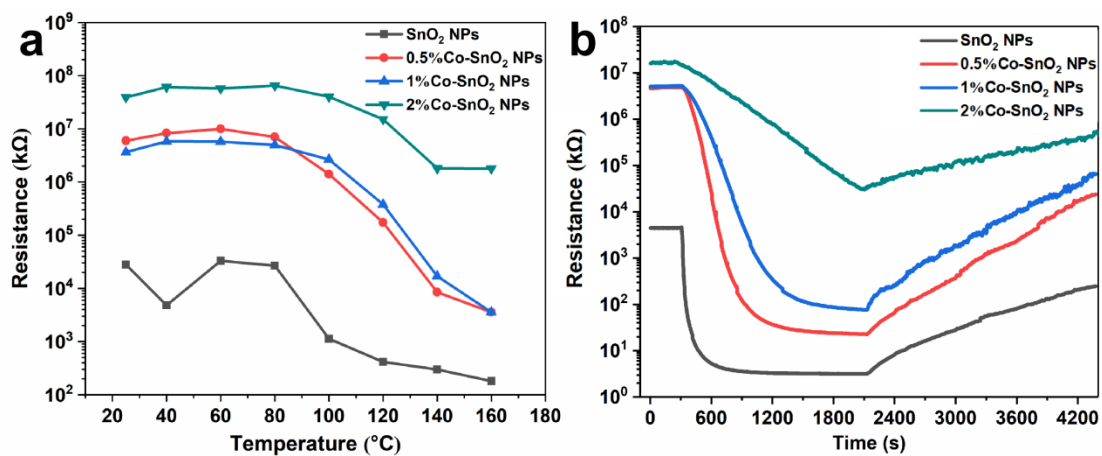

**Figure S4** (a) The change curves of resistance  $R_a$  of samples in air with temperature, (b) the resistance change curves of the samples with 30 ppm formaldehyde at 90°C.

### Limit of detection (LOD) calculation

The sensor noise ( $RMS_{noise}$ ) is usually calculated from the standard deviation of the sensor baseline. From figure 6 (b), 270 points were collected before the sensor was placed on the target gas, and the calculated standard deviation (S) was 0.0128.

$$RMS_{noise} = \sqrt{\frac{S^2}{N}} \quad (S1)$$

where N is the number of data points. The value of  $RMS_{noise}$  is 0.00078. The ratio of signal (S) to noise (N)(S/N) is 3 (International Union of Pure and Applied Chemistry (IUPAC) definition) and the slope is 4259.0 (From figure 9 (b)), therefore:

$$LOD = 3 \frac{RMS_{noise}}{Slope} = 3 \times \frac{0.00078}{4259} = 0.00000055 \text{ ppb} \quad (S2)$$

in this work, the theoretical detection limit of formaldehyde was estimated to be about  $5.5 \times 10^{-7}$  ppb.

#### Calculation of the Debye lengths of $SnO_2$

$$\lambda_D = \sqrt{\frac{\epsilon k_B T}{q^2 N_0}} \quad (S3)$$

$$\epsilon_{SnO_2} = 13.5 \times 8.85 \times 10^{-12} \text{ Fm}^{-1}$$

$$k_B = 1.38 \times 10^{-23} \text{ JK}^{-1}$$

$$T = 363 \text{ K}$$

$$q = 1.6 \times 10^{-19} \text{ C}$$

$$N_{SnO_2} = 3.6 \times 10^{18} \text{ cm}^{-3}$$

$$\lambda_{SnO_2} = 2.55 \text{ nm}$$
